# Supplementary material for: Preventive Effect of Residential Green Space on Infantile Atopic Dermatitis Associated with Prenatal Air Pollution Exposure
Source: Int J Environ Res Public Health. 2018 Jan 9;15(1):102. doi: 10.3390/ijerph15010102 (PMC5800201; doi:10.3390/ijerph15010102)
Supplement: Supplementary file 1 [file ijerph-15-00102-s001.pdf]

**Table S1.** Characteristics of study participants who were included and not included in the present study.

| Characteristics                            | Included<br>participants<br>( <i>n</i> = 659) | Excluded<br>participants<br>( <i>n</i> = 727) | <i>p</i> -value <sup>1</sup> |
|--------------------------------------------|-----------------------------------------------|-----------------------------------------------|------------------------------|
| <i>Maternal</i>                            |                                               |                                               |                              |
| Age (years), mean (SD)                     | 30.5 (3.5)                                    | 30.2 (3.8)                                    | 0.161                        |
| Education, n (%)                           |                                               |                                               |                              |
| < university                               | 180 (27.3)                                    | 167 (23.0)                                    | 0.062                        |
| ≥ university                               | 479 (72.7)                                    | 560 (77.0)                                    |                              |
| Income per month, n (%)                    |                                               |                                               |                              |
| < \$ 2000                                  | 177 (26.9)                                    | 168 (27.4)                                    | 0.967                        |
| \$ 2000-4000                               | 354 (53.7)                                    | 325 (53.0)                                    |                              |
| > \$ 4000                                  | 128 (19.4)                                    | 120 (19.6)                                    |                              |
| Pre-pregnancy BMI <sup>2</sup> , mean (SD) | 21.3 (2.9)                                    | 21.0 (2.9)                                    | 0.083                        |
| Parity, n (%)                              |                                               |                                               |                              |
| 0                                          | 315 (47.8)                                    | 260 (52.4)                                    | 0.297                        |
| ≥ 1                                        | 344 (52.2)                                    | 236 (47.6)                                    |                              |
| History of allergy, n (%)                  |                                               |                                               |                              |
| No                                         | 470 (71.3)                                    | 225 (67.0)                                    | 0.287                        |
| Yes                                        | 189 (28.7)                                    | 111 (33.0)                                    |                              |
| Exposure to SHS, n (%)                     |                                               |                                               |                              |
| No                                         | 400 (60.7)                                    | 397 (54.6)                                    | 0.109                        |
| Yes                                        | 259 (39.3)                                    | 330 (45.4)                                    |                              |
| Residential mobility, n (%)                |                                               |                                               |                              |
| No                                         | 575 (87.2)                                    | 301 (89.3)                                    | 0.344                        |
| Yes                                        | 84 (12.8)                                     | 36 (10.7)                                     |                              |
| Gestational age (weeks), mean (SD)         | 39.0 (1.1)                                    | 39.1 (1.05)                                   | 0.295                        |
| Type of birth, n (%)                       |                                               |                                               |                              |
| Vaginal birth                              | 425 (64.5)                                    | 385 (63.4)                                    | 0.436                        |
| Cesarean section                           | 234 (35.5)                                    | 222 (36.6)                                    |                              |
| Season of birth, n (%)                     |                                               |                                               |                              |
| Winter                                     | 184 (27.9)                                    | 227 (31.2)                                    | 0.179                        |
| Others                                     | 475 (72.1)                                    | 500 (68.8)                                    |                              |
| Presence of pets, n (%)                    |                                               |                                               |                              |
| No                                         | 642 (97.4)                                    | 321 (94.7)                                    | 0.026                        |
| Yes                                        | 17 (2.6)                                      | 18 (5.3)                                      |                              |
| <i>Infant</i>                              |                                               |                                               |                              |
| Sex, n (%)                                 |                                               |                                               |                              |
| Male                                       | 358 (54.3)                                    | 364 (50.1)                                    | 0.102                        |
| Female                                     | 301 (45.7)                                    | 363 (49.9)                                    |                              |
| Birth weight (grams), mean (SD)            | 3310 (374.4)                                  | 3307 (378.8)                                  | 0.866                        |
| Breastfeeding, n (%)                       |                                               |                                               |                              |
| Exclusive breast-feeding                   | 238 (36.1)                                    | 138 (41.0)                                    | 0.136                        |
| Exclusive formula or mixed feeding         | 421 (63.9)                                    | 199 (59.0)                                    |                              |
| Atopic dermatitis at 6 months, n (%)       |                                               |                                               |                              |
| No                                         | 492 (74.7)                                    | 232 (68.8)                                    | 0.051                        |
| Yes                                        | 167 (25.3)                                    | 105 (31.2)                                    |                              |

Of the 812 participants who were excluded, we considered 727 after removing 85 participants for low birth weight and preterm birth. <sup>1</sup> P value by *t* test or  $\chi^2$  test. <sup>2</sup> Weight in kilograms/height in m<sup>2</sup>.
